# Supplementary material for: Novel borothermal process for the synthesis of nanocrystalline oxides and borides of niobium
Source: Royal Society of Chemistry journal article supplement (doi:10.1039/c1dt10468c), 2011-01-01
Supplement: c1dt10468c.pdf [file c1dt10468c.pdf]

Supplementary figure

|           |                                                                                                                |
|-----------|----------------------------------------------------------------------------------------------------------------|
| Figure S1 | Thermogravimetric plot of niobium precursor shows sharp transition at 113°C due to loss of water molecules.    |
| Figure S2 | PXRD of the Nb <sub>2</sub> O <sub>5</sub> obtained after heating of NbO <sub>2</sub> at 800°C for 6 h in air. |

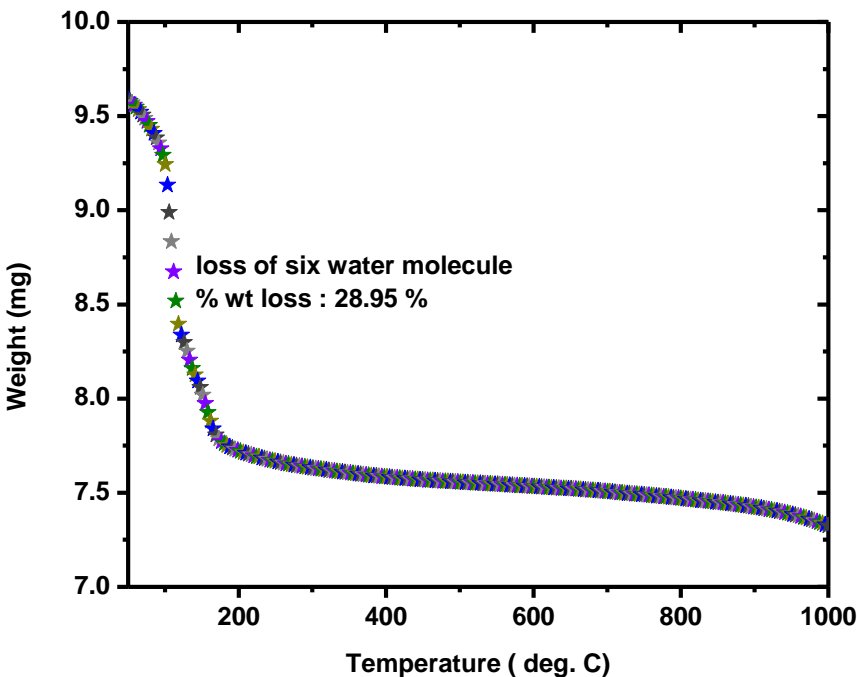

Figure S1

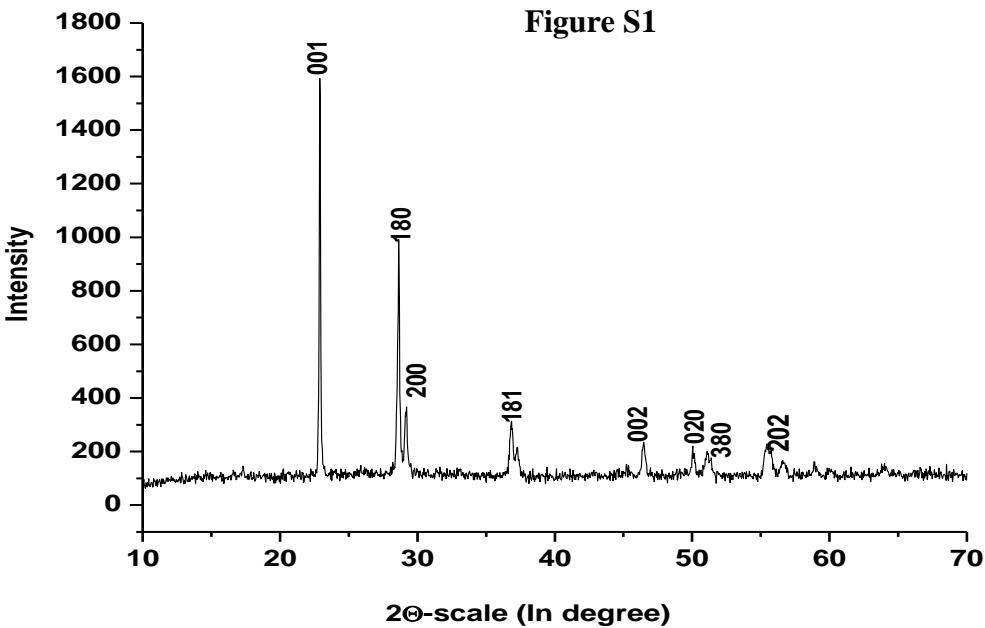

Figure S2
